# Supplementary material for: Dexamethasone as an Adjuvant to Erector Spinae Plane Block in Cardiac Surgery: A Randomized Controlled Trial on Postoperative Recovery and Pain chronification
Source: Research Square preprint supplement (doi:10.21203/rs.3.rs-8308763/v1), 2026-01-24
Supplement: Supplementary file 1 [file d3620d2d334953280d2604ce.docx]

## **Research Protocol – WHO format**

### **1. General Information**

- **Protocol title**

*Dexamethasone as an Adjuvant to Erector Spinae Plane Block in Cardiac Surgery: A Randomized Controlled Trial on Postoperative Recovery and Pain Chronification*

- **Clinical trial registration**

ClinicalTrials.gov, ID: NCT04313959.

Registration date: **[insert exact registration date from ClinicalTrials.gov]**.

Study start (first patient enrolled): 20 January 2022.

- **Protocol version and date**

Version: 1.0

Date: **18 Dec. 25**

- **Principal Investigator (PI)**

Dr. Luis Alberto Rodríguez Linares, MD, PhD

University of São Paulo School of Medicine / Instituto do Coração (InCor), São Paulo, Brazil.

- **Co-Investigators**

Raquel Chacon Ruiz Martinez, Vanessa Henriques Carvalho, Lais Helena Navarro e Lima, Suely Pereira Zeferino, Juliana Oliveira Carneiro, Filomena Regina Barbosa Gomes Galas,

- **Study site**

Instituto do Coração (InCor), University of São Paulo, São Paulo, Brazil.

- **Sponsor and funding**

Self-funded by the investigators; no external commercial or governmental funding.

- **Ethics approval**

Approved by the institutional Research Ethics Committee (protocol No. 3.830.029).

### **2. Background and Rationale**

Median sternotomy for CABG is associated with substantial acute chest wall pain and a high incidence of chronic post-sternotomy pain, which impairs recovery and quality of life. Thoracic epidural analgesia can improve pain but is limited in cardiac surgery due to anticoagulation and risk of neuraxial hematoma. The erector spinae plane (ESP) block has emerged as a safer regional alternative, reducing pain and opioid use and potentially facilitating early extubation, but its duration remains limited.

Dexamethasone is a well-established adjuvant that prolongs peripheral nerve block analgesia, yet its role in fascial plane blocks during cardiac surgery remains undefined. There is a clear knowledge gap regarding whether perineural dexamethasone added to ESP blocks can enhance perioperative recovery and mitigate pain chronification after CABG.

### **3. Objetives**

- **Primary objective**

To determine whether adding perineural dexamethasone to bilateral ESP blocks reduces postoperative pain intensity (VAS/NRS) at rest and during movement after CABG.

- **Secondary objectives**
  - To evaluate the effect of dexamethasone on duration of mechanical ventilation.
  - To compare 48-hour opioid consumption between groups.
  - To assess subacute and chronic pain at 30, 60, and 90 days using the Brief Pain Inventory (BPI).
  - To describe adverse events potentially related to ESP block or dexamethasone.

### **4. Study Design**

Prospective, single-centre, randomized, double-blind, controlled clinical trial with two parallel groups (1:1 allocation ratio):

1. ESP block with 0.2% ropivacaine (control).
2. ESP block with 0.2% ropivacaine plus 8 mg perineural dexamethasone (4 mg per side).

The trial follows CONSORT guidelines for randomized studies.

### **5. Study Population**

- **Target population**

Adult patients undergoing elective CABG via median sternotomy with preserved LV function.

- **Inclusion criteria**
  - Age >18 years.
  - Scheduled for elective CABG.
  - Left ventricular ejection fraction (LVEF) ≥45%.
  - Ability to provide written informed consent.
- **Exclusion criteria**
  - Allergy to local anesthetics or dexamethasone.
  - Coagulopathy.
  - Chronic opioid therapy.
  - Relevant psychiatric disorders.
  - Reoperation, emergency, or combined procedures.
  - Refusal to participate.

### **6. Interventions**

- **ESP block technique**
  - Timing: after induction of general anesthesia and hemodynamic stabilisation.
  - Ultrasound-guided bilateral ESP block at T5 level using a 12–15 MHz linear probe.
  - Needle: 22-gauge echogenic needle advanced in-plane to the fascial plane between the erector spinae muscle and transverse process.
  - Injection: 25 mL per side of 0.2% ropivacaine (max total dose 3 mg·kg⁻¹).
  - Dexamethasone group: 4 mg (1 mL) dexamethasone added per side (total 8 mg), maintaining the same overall volume.
- **Control group**

0.2% ropivacaine only, same volume and technique.

- **Perioperative management**
  - Standardized general anesthesia protocol (midazolam, etomidate, fentanyl, cisatracurium, sevoflurane).
  - Standard CPB management and surgical technique by the same team.
  - Standardized multimodal postoperative analgesia (e.g., metamizole, tramadol, IV morphine as rescue).
  - No additional corticosteroids or sedative infusions beyond protocol.

### **7. Outcomes**

- **Primary outcome**
  - Postoperative pain intensity (VAS and NRS, 0–10) at rest and during movement, measured preoperatively, on ICU arrival, and daily until day 7 or discharge.
- **Secondary outcomes**
  - Mechanical ventilation duration (minutes from ICU admission to extubation).
  - Cumulative opioid consumption over 48 hours post-extubation.
  - BPI scores (pain severity and interference domains) at 30, 60, and 90 days.
  - Adverse events related to ESP block or dexamethasone (e.g., pneumothorax, hematoma, infection, neurologic deficit, steroid complications).
  - ICU and hospital length of stay.

### **8. Sample Size**

Based on previous data, a between-group difference of 1.5 points in pain scores (SD 1.5) was considered clinically relevant. With α = 0.05 and 80% power, at least 20 patients per group were required. Allowing for ~5% attrition, 44 patients were planned, of whom 43 completed follow-up (21 control, 22 dexamethasone).

### **9. Randomization and Blinding**

Randomization was performed using a computerized sequence with 1:1 allocation, concealed in sequentially numbered, opaque envelopes opened immediately before induction.

Patients, surgeons, ICU staff, and outcome assessors were blinded to allocation. The anesthesiologist performing the ESP block was not involved in postoperative data collection. Study syringes were prepared identically to maintain blinding.

### **10. Study Procedures and Follow-up**

- **Screening and enrolment**
  - Eligibility confirmed during preoperative assessment.
  - Written informed consent obtained.
- **Baseline data collection**
  - Demographics, comorbidities, functional status, baseline pain.
- **Perioperative data**
  - Anesthetic drugs, CPB time, aortic cross-clamp time, intraoperative opioids, and intraoperative complications.
- **Postoperative data (in-hospital)**
  - Pain scores (days 0–7).
  - Opioid consumption within 48 h.
  - Mechanical ventilation time, ICU/hospital length of stay.
  - Adverse events and complications.
- **Follow-up (30, 60, 90 days)**
  - Telephone or outpatient BPI assessment for pain intensity and interference domains.

### **11. Data Management and Statistical Analysis**

Data are recorded in REDCap and exported for analysis in IBM SPSS Statistics v22.0.

- Continuous variables: normality assessed via Shapiro–Wilk; compared by Student’s t-test or Mann–Whitney U as appropriate.
- Categorical variables: Chi-square or Fisher’s exact test.
- Repeated measures (pain scores, BPI): analysed with Generalized Estimating Equations or Friedman tests, with Bonferroni corrections.
- Significance level: two-tailed p < 0.05.

### **12. Ethical Considerations**

The study complies with the Declaration of Helsinki and local regulations.

- Risks: ESP block-related complications (rare), transient steroid-related hyperglycaemia, standard surgical/anesthetic risks.
- Benefits: potential for improved analgesia and recovery; contribution to evidence on ESP blocks in cardiac surgery.
- Informed consent: obtained before any study procedure, with explanation of risks, benefits, and right to withdraw without prejudice.
- Confidentiality: participant data de-identified and stored securely; access restricted to study team.

### **13. Dissemination and Data Sharing**

Results will be submitted for publication in peer-reviewed journals and presented at scientific meetings.

Data availability statement will follow the journal’s policy (e.g. “data available from corresponding author on reasonable request” or other).
